# Supplementary material for: Engineering the NiO/CeO2 interface to enhance the catalytic performance for CO oxidation
Source: Royal Society of Chemistry journal article supplement (doi:10.1039/c5ra20466f), 2015-01-01
Supplement: c5ra20466f1.pdf [file c5ra20466f1.pdf]

## **Engineering the NiO/CeO<sub>2</sub> interface to enhance the catalytic performance for CO oxidation**

Weixin Zou,<sup>a,b†</sup> Chengyan Ge,<sup>c†</sup> Minyue Lu,<sup>a,b</sup> Shiguo Wu,<sup>a,b</sup> Yongzheng

Wang,<sup>a</sup> Jingfang Sun,<sup>b</sup> Yu Pu,<sup>a</sup> Changjin Tang,<sup>a,b</sup> Fei Gao,<sup>\*a,b</sup> Lin

Dong<sup>\*a,b</sup>

<sup>a</sup> Key Laboratory of Mesoscopic Chemistry of MOE, School of Chemistry and Chemical Engineering, Nanjing University, Nanjing 210093, PR China

<sup>b</sup> Jiangsu Key Laboratory of Vehicle Emissions Control, Center of Modern Analysis, Nanjing University, Nanjing 210093, PR China

<sup>c</sup> School of Chemistry and Chemical Engineering, Yancheng Institute of Technology, Yanchen 224051, PR China

† These authors contribute equally.

### **Corresponding Author**

\*E-mail: gaofei@nju.edu.cn, donglin@nju.edu.cn Tel: +86-25-83592290 Fax: +86-

25-83317761

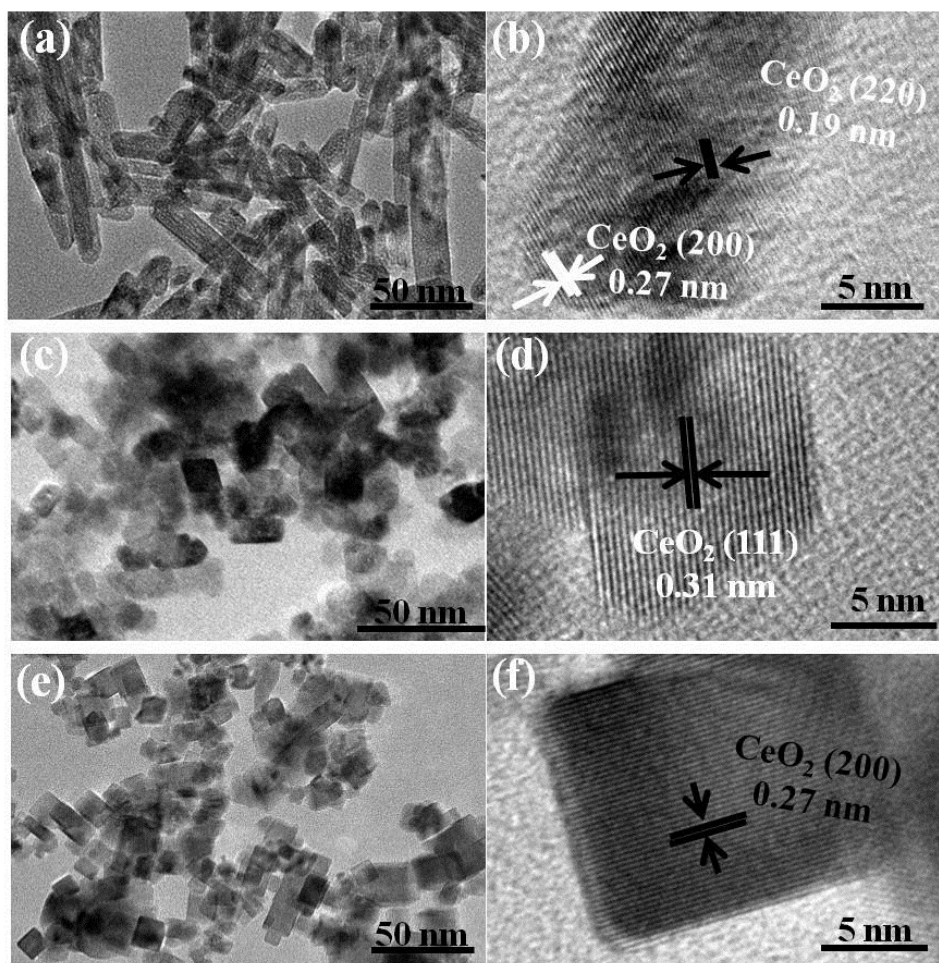

Figure S1. TEM and HRTEM images of CeO<sub>2</sub> (a, b) nanorod; (c, d) nanooctahedron; (e, f) nanocube.

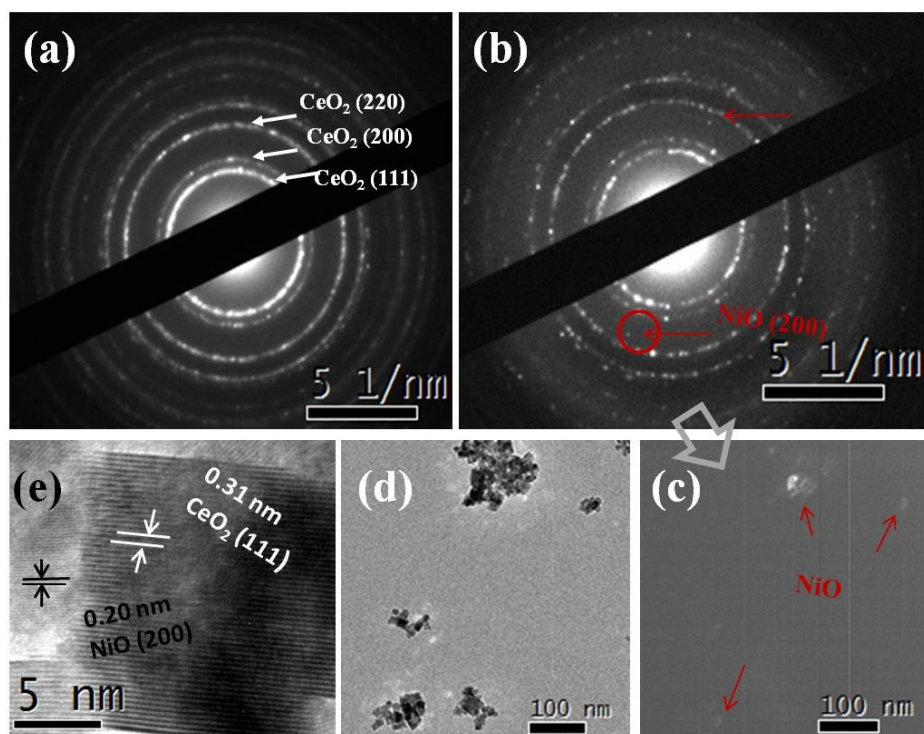

Figure S2. Electron diffraction patterns of (a) CeO<sub>2</sub> octahedron, (b) Ni/CeO<sub>2</sub> octahedron; (c) the corresponding dark field image of white spot in the red circle; (d) the corresponding bright field image; (e) the HRTEM image of Ni/CeO<sub>2</sub> octahedron.

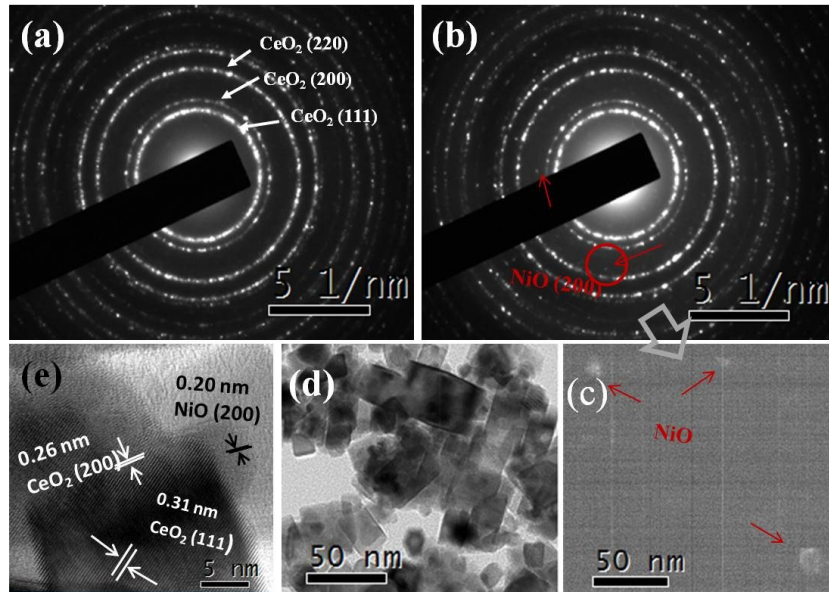

Figure S3. Electron diffraction patterns of (a) CeO<sub>2</sub> cube, (b) Ni/CeO<sub>2</sub> cube; (c) the corresponding dark field image of white spot in the red circle; (d) the corresponding bright field image; (e) the HRTEM image of Ni/CeO<sub>2</sub> cube.

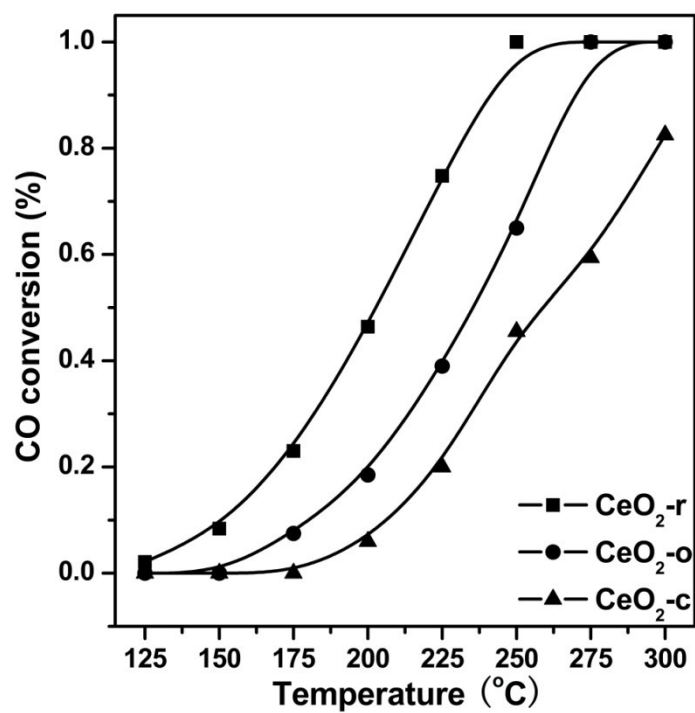

Figure S4. CO conversion over CeO<sub>2</sub> catalysts with different shapes.

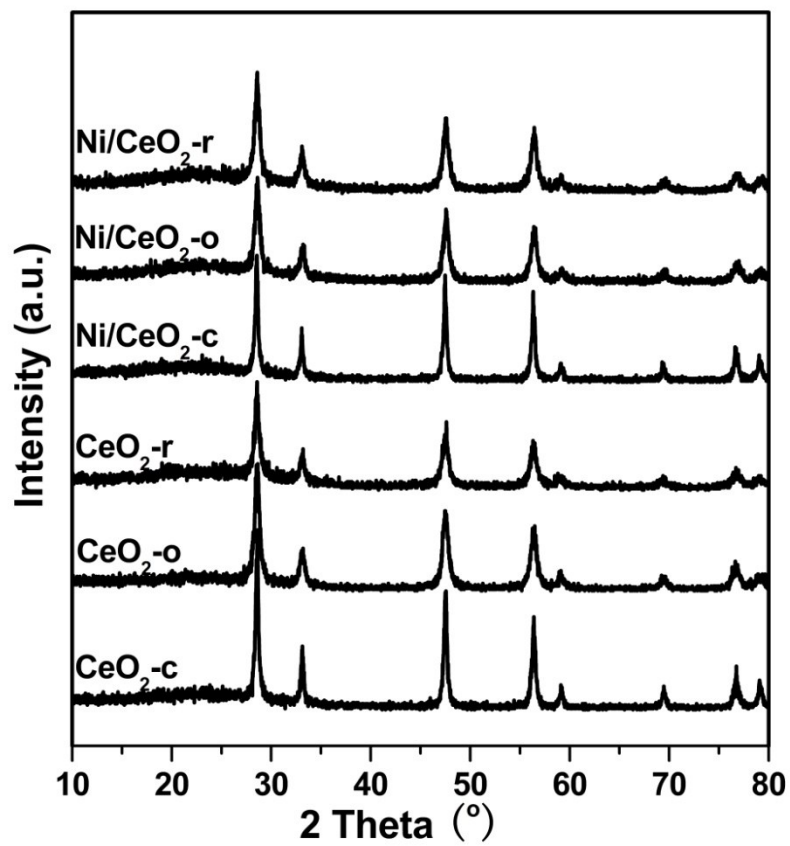

Figure S5. XRD patterns of Ni/CeO<sub>2</sub> and CeO<sub>2</sub> samples with different shapes.

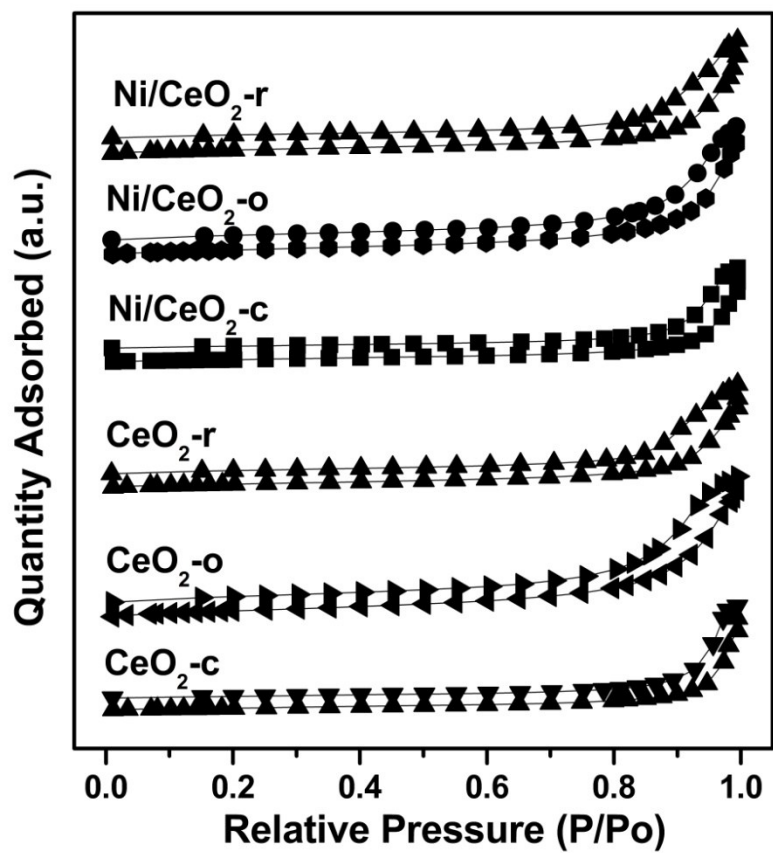

Figure S6. N<sub>2</sub> adsorption–desorption isotherms of Ni/CeO<sub>2</sub> and CeO<sub>2</sub> samples with different shapes.

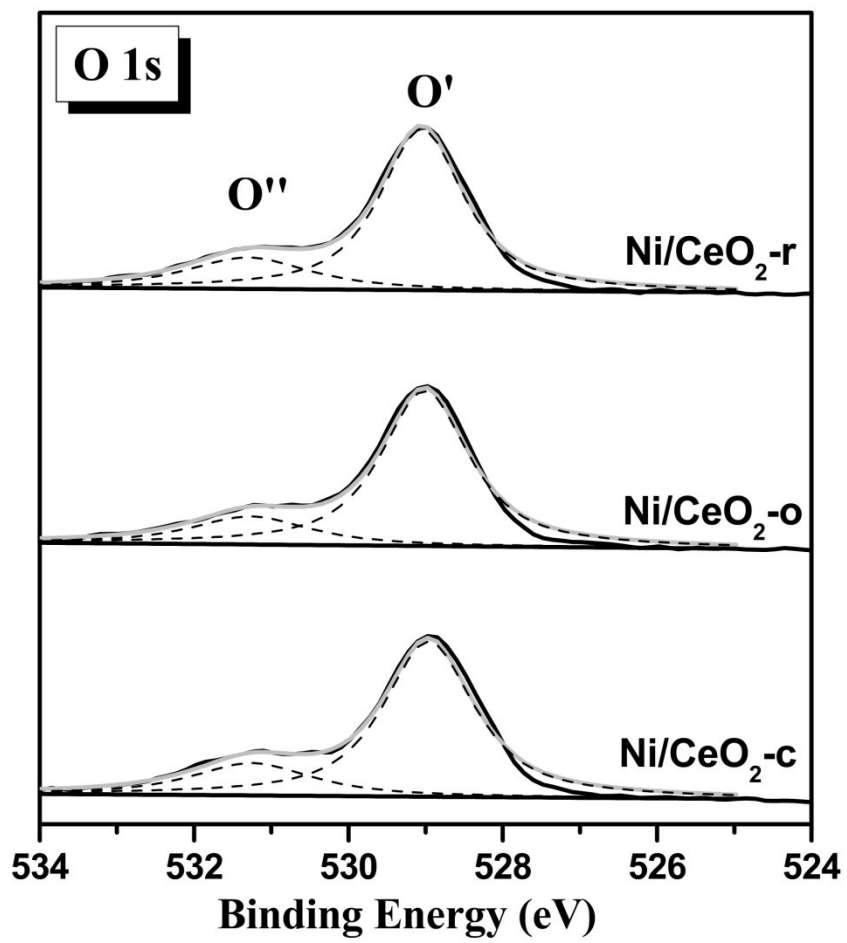

Figure S7. XPS spectra of O 1s over Ni/CeO<sub>2</sub> catalysts with different shapes.



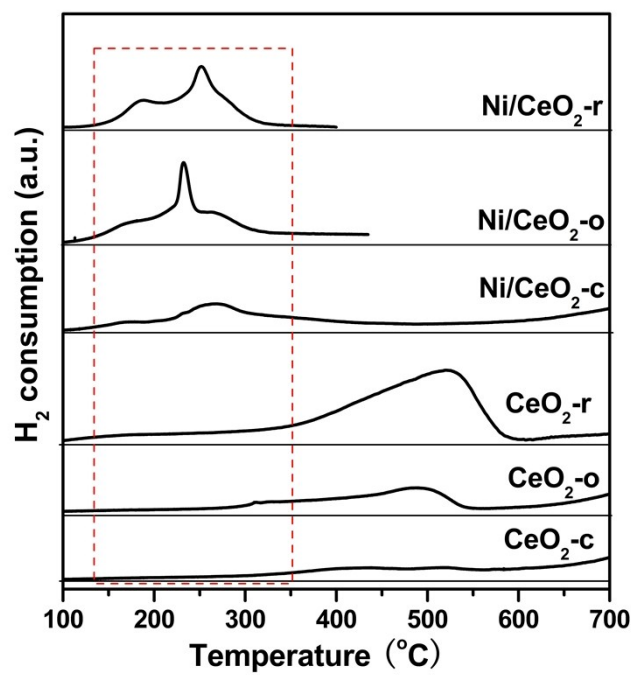

Figure S8. H<sub>2</sub>-TPR profiles of Ni/CeO<sub>2</sub> and CeO<sub>2</sub> with different shapes.

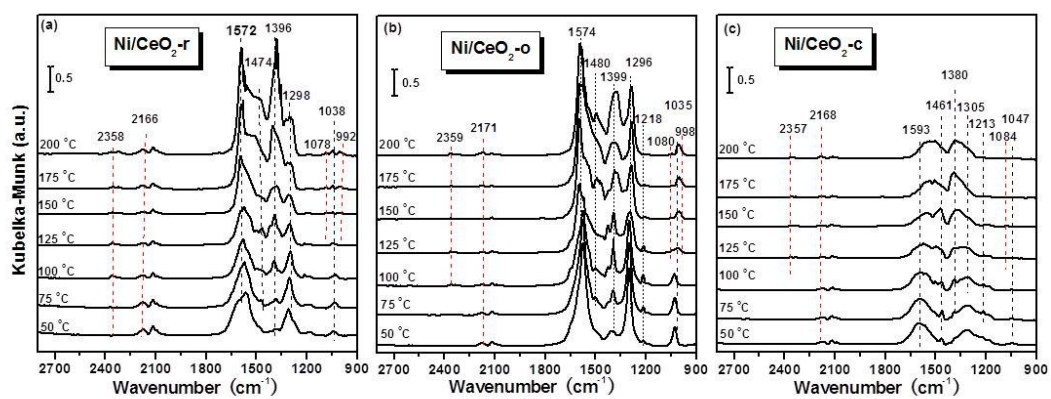

Figure S9. *In-situ* CO-adsorption DRIFTS of Ni/CeO<sub>2</sub> catalysts with different shapes.

Table S1. Surface area, crystallite size, lattice parameter,  $I_{605+1172}/I_{460}$  in Raman spectra and turnover frequency ( $TOF_{CO}$ ) at 120 °C of Ni/CeO<sub>2</sub> and CeO<sub>2</sub> samples, respectively.

| Samples                | $S_{BET}$<br>(m <sup>2</sup> /g) | Grain size<br>(nm) | Lattice parameter<br>(Å) | $I_{605+1172}/I_{460}$<br>0 | $TOF_{CO}^a$<br>(h <sup>-1</sup> ) |
|------------------------|----------------------------------|--------------------|--------------------------|-----------------------------|------------------------------------|
| Ni/CeO <sub>2</sub> -r | 64                               | 12.8               | 5.4052                   | 0.32                        | 35.2                               |
| Ni/CeO <sub>2</sub> -o | 84                               | 16.6               | 5.4050                   | 0.21                        | 10.1                               |
| Ni/CeO <sub>2</sub> -c | 30                               | 24.8               | 5.4011                   | 0.12                        | 0.5                                |
| CeO <sub>2</sub> -r    | 66                               | 11.5               | 5.4133                   | 0.054                       |                                    |
| CeO <sub>2</sub> -o    | 85                               | 12.9               | 5.4064                   | 0.051                       |                                    |
| CeO <sub>2</sub> -c    | 32                               | 24.6               | 5.4022                   | 0.046                       |                                    |

a:  $TOF_{CO} = P \cdot Sv \cdot C_{CO} \cdot X_{CO} / R \cdot T \cdot C_{Ni}$ , in which P was the atmospheric pressure,  $C_{CO}$  was the molar CO concentration at the inlet, Sv was the space velocity, X was the CO conversion and  $C_{Ni}$  was the molar concentration of surface Ni atoms determined by XPS.
